# Supplementary material for: Iron phthalocyanine modified mesoporous titania nanoparticles for photocatalytic activity and CO2 capture applications
Source: Royal Society of Chemistry journal article supplement (doi:10.1039/c5cp03576g), 2015-01-01
Supplement: c5cp03576g1.pdf [file c5cp03576g1.pdf]

**Electronic supporting information**

**Iron Phthalocyanine Modified Mesoporous Titania  
Nanoparticles for Photocatalytic Activity and CO<sub>2</sub> Capture  
Applications**

P.V.R.K. Ramacharyulu<sup>a</sup>, Raees Muhammad<sup>a</sup>, J. Praveen kumar<sup>b</sup>, G. K. Prasad<sup>b\*</sup>,  
Paritosh Mohanty<sup>a\*</sup>

<sup>a</sup>Department of Applied science & engineering, IIT Roorkee, Saharanpur-247001 (U.P.),  
India

<sup>b</sup>Defence R & D Establishment, Jhansi Road, Gwalior-474002 (M.P.), India

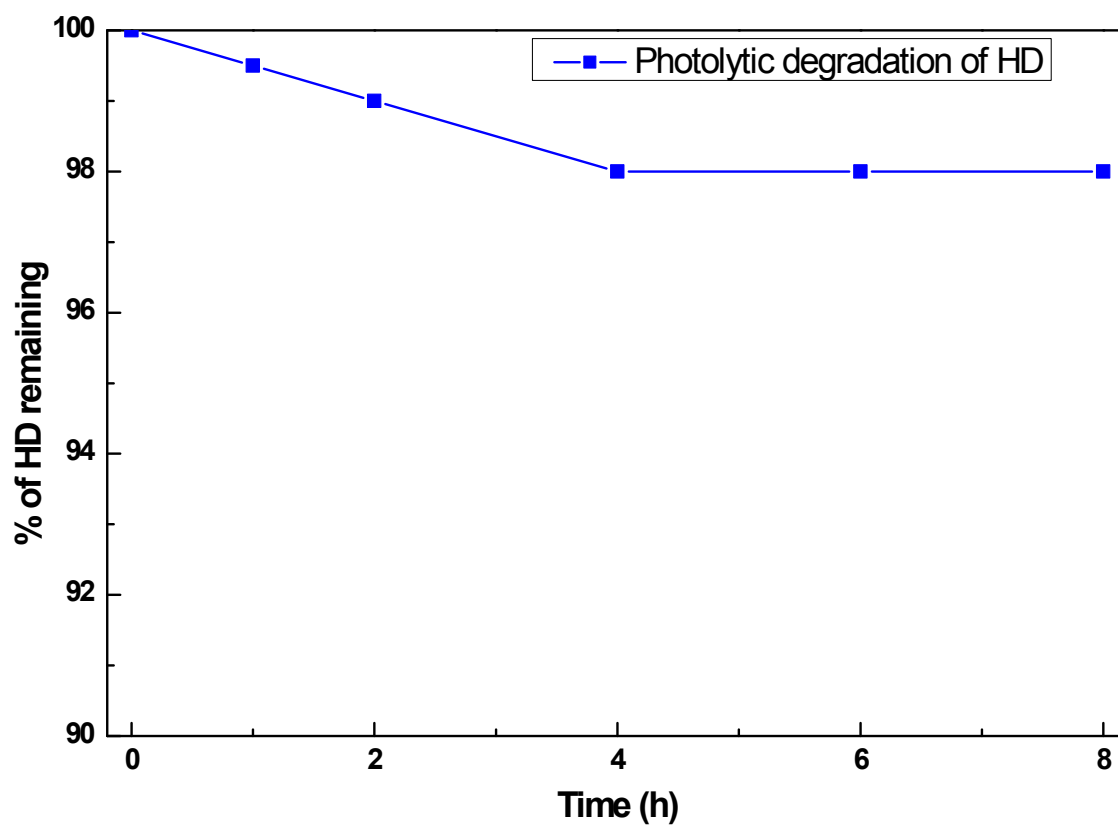

**Figure-S1:** Photolytic degradation of sulphur mustard in the absence of any catalyst under sunlight exposure.

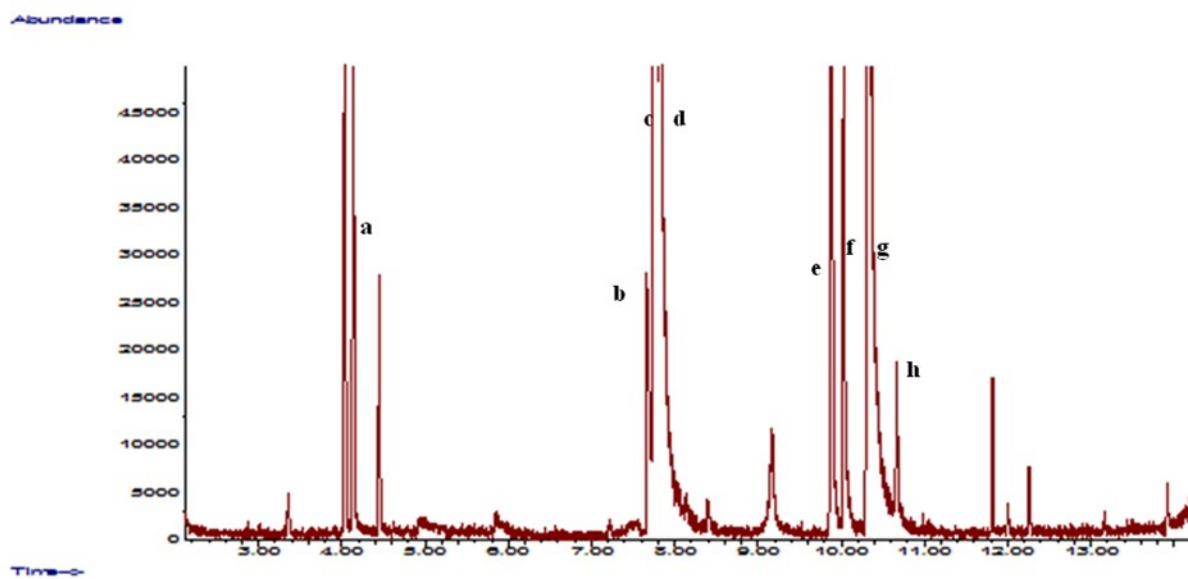

a- chloroethylvinyl sulfide, b- chloroethyl vinyl sulfoxide, c- bis(2-chloroethyl) sulfide,  
d- 2-chloroethyl 2-hydroxyethyl sulfide, e- bis(2-chloroethyl) disulfide,  
f- 2-chloroethyl 2-hydroxyethyl disulfide, g- bis(2-chloroethyl) sulfoxide, h- bis(2-chloroethyl) sulfone

**Figure-S2: GC-MS spectra of SM & degradation products in sunlight on TiO<sub>2</sub> nano catalysts**

Fepc-TiO<sub>2</sub>, Database NIST, Initial temp. 50 °C, final temp. 280 °C, Ramp 10 °C/min, a - Bis(2-chloroethyl) sulfide (HD),  
b - Bis (2-chloroethyl) disulfide (HDDS)

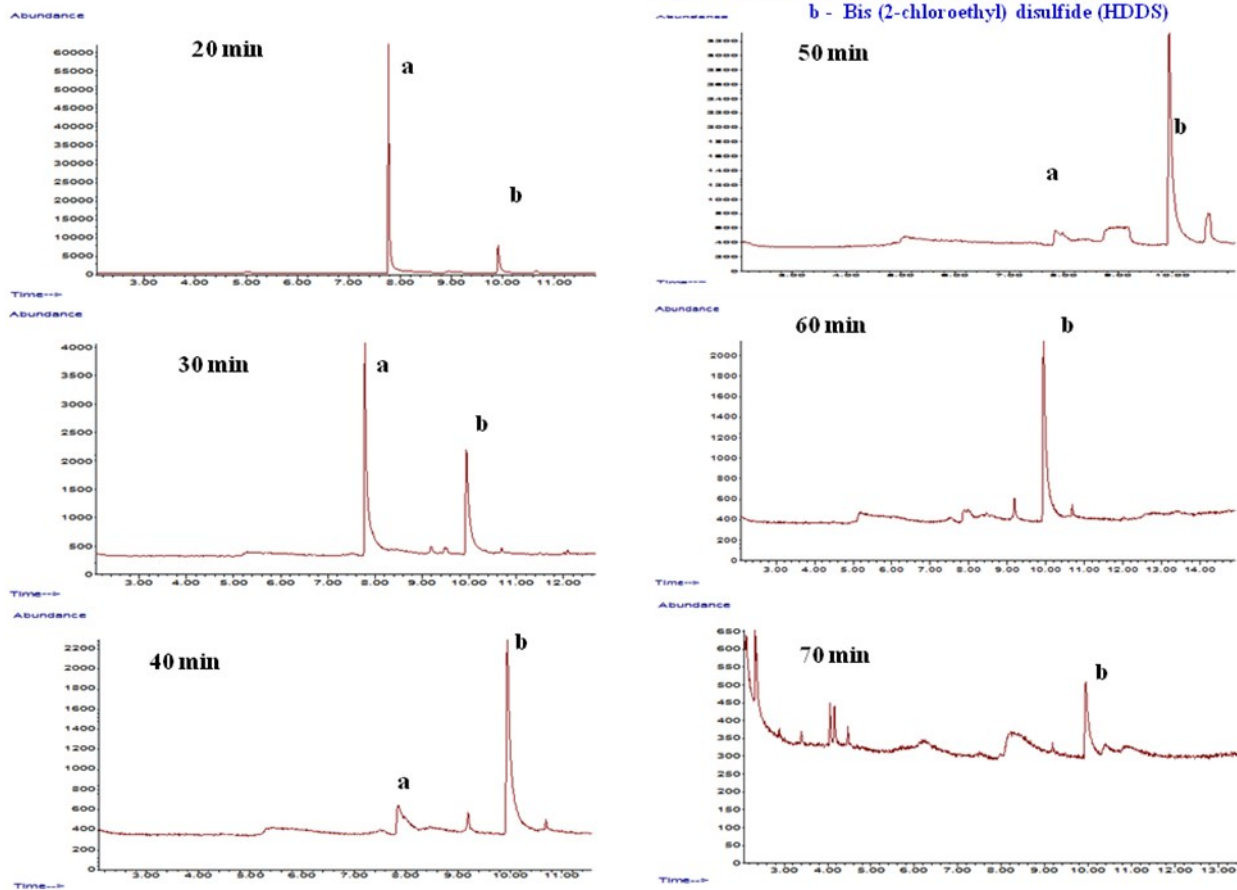

Figure-S3: GC-MS spectra of SM & SM disulfide on Fepc-TiO<sub>2</sub> w.r.t time

Nano TiO<sub>2</sub>, Database NIST, Initial temp. 50 °C, final temp. 280 °C, Ramp 10 °C/ min, a - Bis(2-chloroethyl ) sulfide (HD),  
b - Bis (2-chloroethyl) disulfide (HDDS)

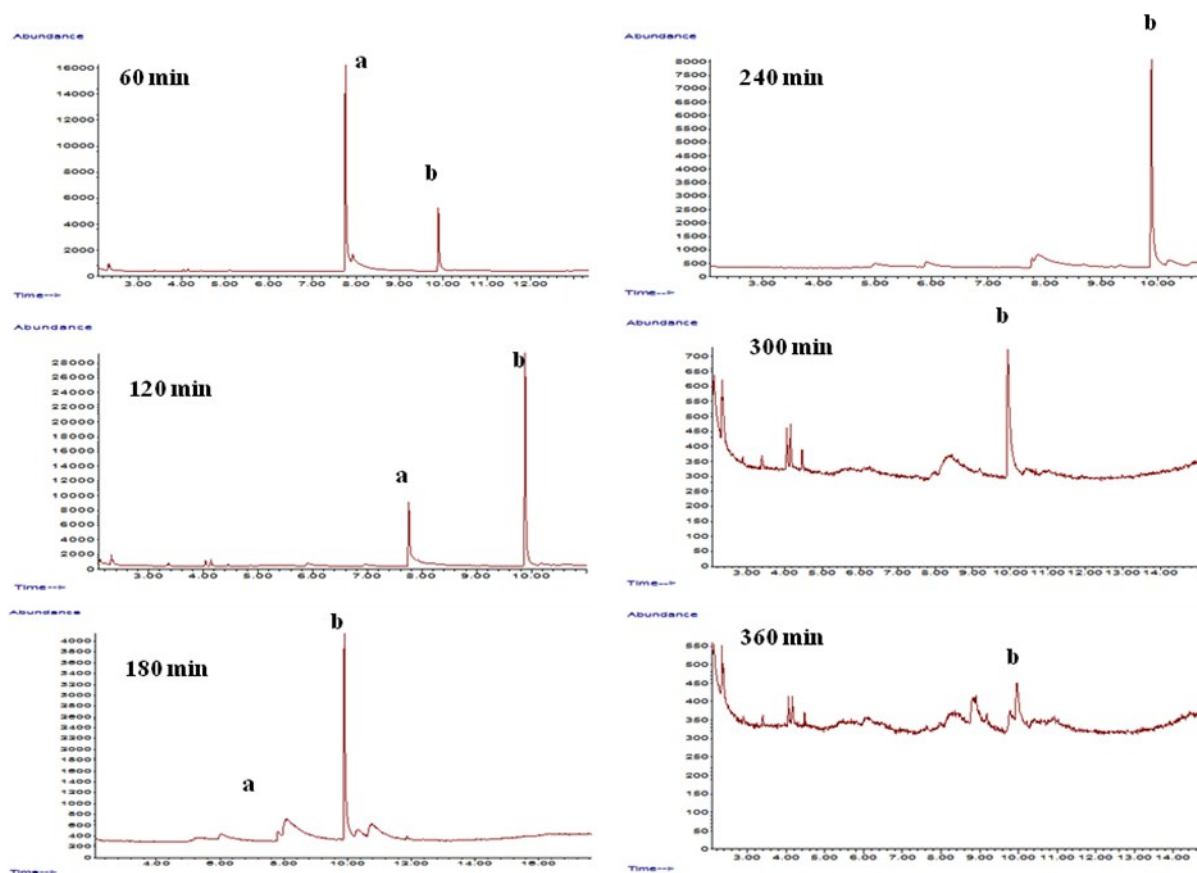

Figure-S4: GC-MS spectra of SM & SM disulfide on nano TiO<sub>2</sub> w.r.t time

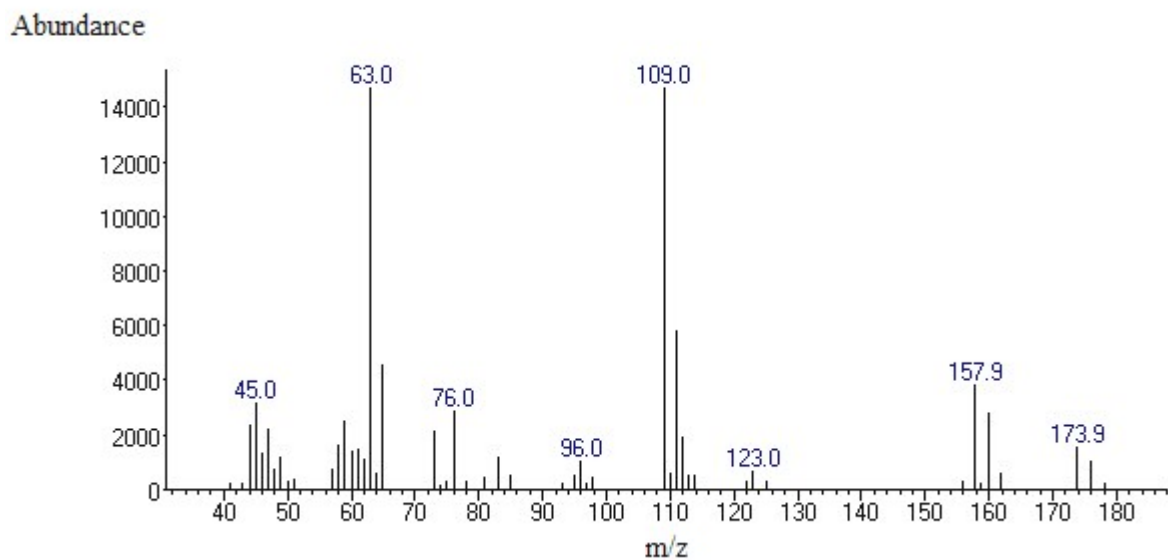

**Figure-S5:** Mass spectrum of SM sulfoxide

Name: Bis( $\beta$ -chloroethyl) sulfoxide (Bis(2-chloroethyl) sulfoxide)

Formula: C<sub>4</sub>H<sub>8</sub>Cl<sub>2</sub>OS

MW: 174 CAS#: 5819-08-9 NIST#: 273377 ID#: 27668 DB: mainlib

Other DBs: RTECS, NIH

Contributor: A.A.Kutin, Moscow, Russia

10 largest peaks:

|        |        |        |        |        |
|--------|--------|--------|--------|--------|
| 63 999 | 27 894 | 76 407 | 65 274 | 47 121 |
| 59 118 | 45 111 | 26 108 | 112 97 | 83 80  |

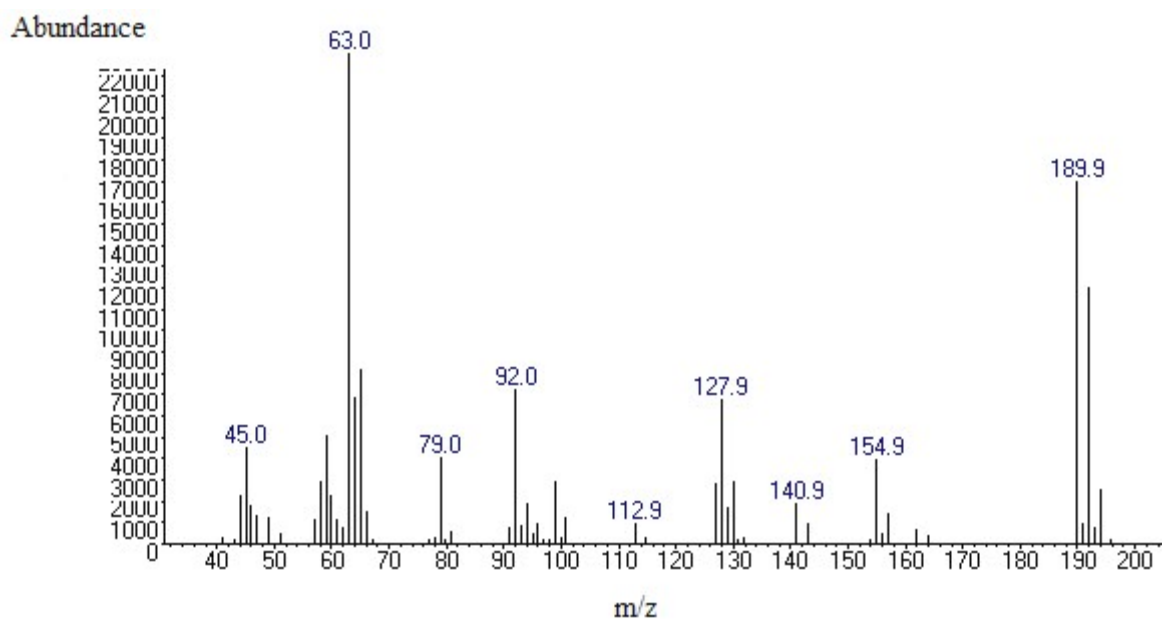

**Figure-S6:** Mass spectrum of SM disulfide

Name: Disulfide, bis(2-chloroethyl) (Bis(2-chloroethyl) disulfide)

Formula: C<sub>4</sub>H<sub>8</sub>Cl<sub>2</sub>S<sub>2</sub>

MW: 190 CAS#: 1002-41-1 NIST#: 273398 ID#: 6901 DB: replib

Other DBs: None

Contributor: A.A.Kutin, Moscow, Russia

10 largest peaks:

|        |         |         |        |        |
|--------|---------|---------|--------|--------|
| 63 999 | 190 649 | 192 469 | 27 427 | 65 334 |
| 64 320 | 128 307 | 92 258  | 36 208 | 59 180 |

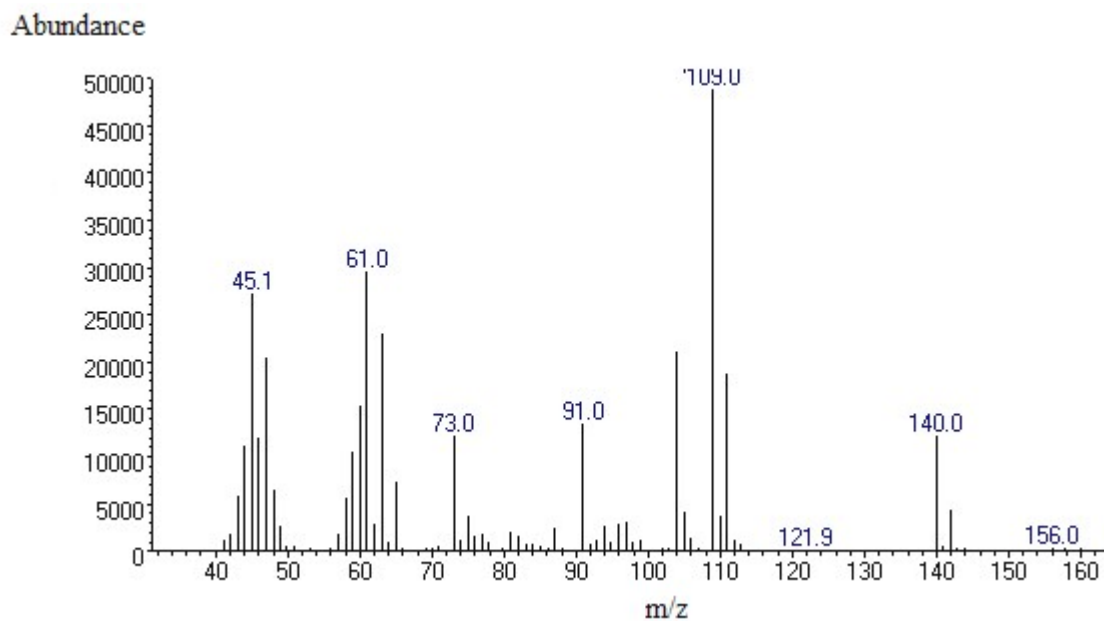

**Figure-S7:** Mass spectrum of Hemi sulphur mustard

Name: Ethanol, 2-(2-chloro-ethylthio)- (Hemisulfur mustard)

Formula: C<sub>4</sub>H<sub>9</sub>ClOS

MW: 140 CAS#: 693-30-1 NIST#: 226653 ID#: 3706 DB: replib

Other DBs: RTECS, NIH

Contributor: Dennis Rohrbaugh, CBDCOM/ERDEC, Edgewood, MD

10 largest peaks:

|        |        |        |         |        |
|--------|--------|--------|---------|--------|
| 45 999 | 61 908 | 47 749 | 109 735 | 63 662 |
| 60 506 | 44 417 | 46 392 | 91 325  | 59 321 |



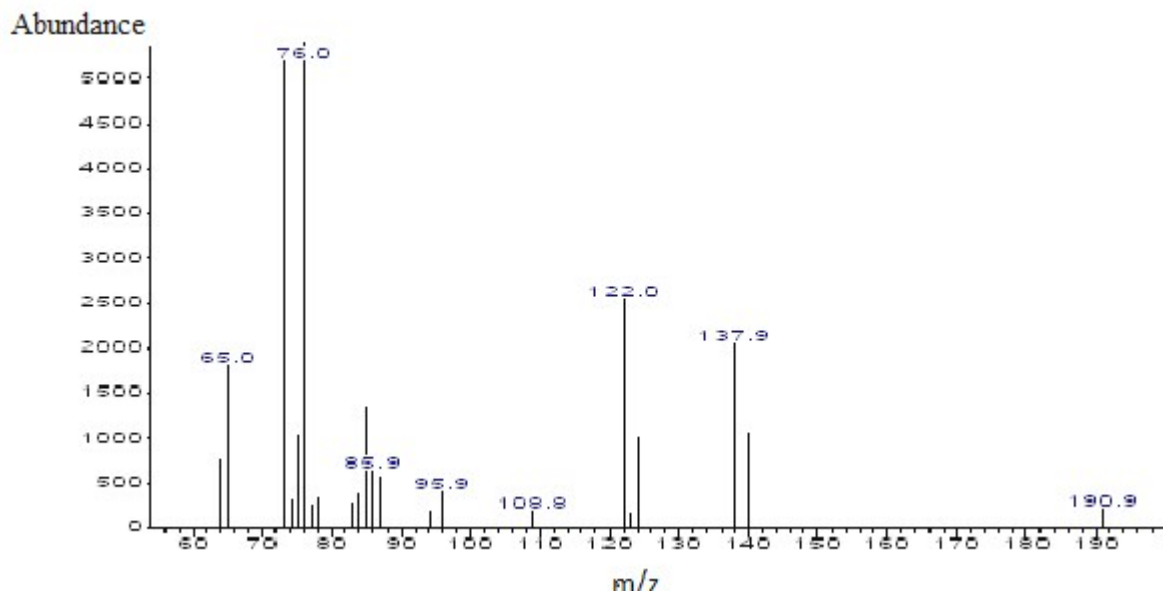

**Figure-S8:** Mass spectrum of chloro ethyl vinyl sulfoxide

Formula: C<sub>4</sub>H<sub>7</sub>ClOS (Vinyl 2-chloroethyl sulfoxide)

MW: 138 CAS#: 40709-82-8 NIST#: 226796 ID#: 39665 DB: mainlib

Other DBs: RTECS

Contributor: Dennis Rohrbaugh, CBDCOM/ERDEC, Edgewood, MD

10 largest peaks:

|        |        |         |        |        |
|--------|--------|---------|--------|--------|
| 76 999 | 63 881 | 138 369 | 65 241 | 58 193 |
| 59 193 | 75 146 | 140 142 | 47 132 | 73 115 |

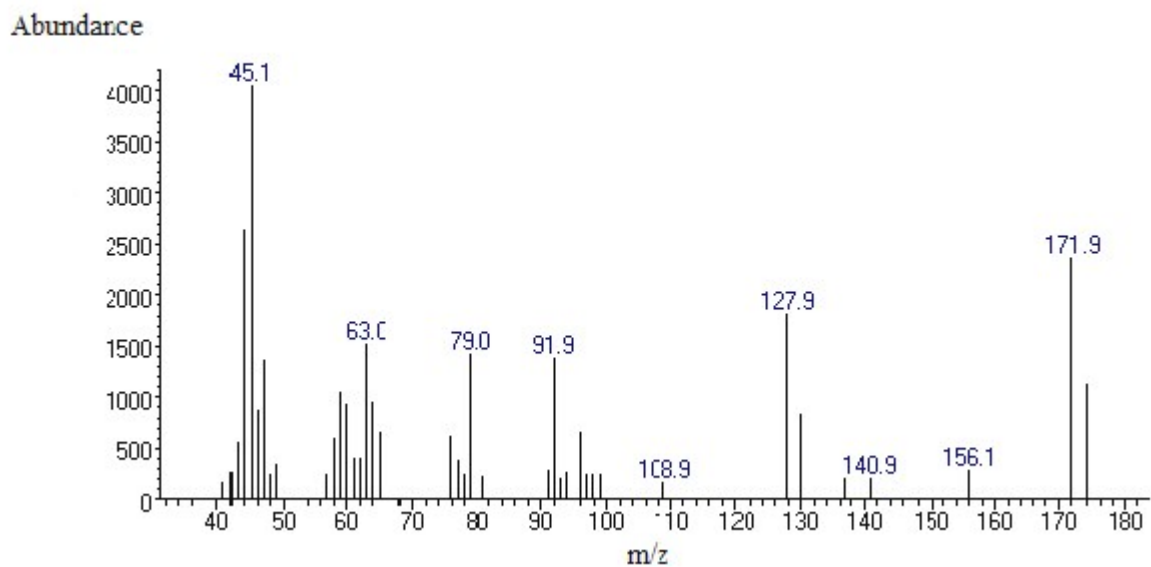

**Figure-S9:** Mass spectrum of 2-(2-Chloro-ethyl)disulfanyl-ethanol

Name: Ethanol, 2-[(2-chloroethyl)dithio]- (2-[(2-Chloroethyl)disulfanyl]ethanol)

Formula: C<sub>4</sub>H<sub>9</sub>ClOS<sub>2</sub>

MW: 172 CAS#: 79503-74-5 NIST#: 226639 ID#: 3690 DB: replib

Other DBs: None

Contributor: Dennis Rohrbaugh, CBDCOM/ERDEC, Edgewood, MD

10 largest peaks:

|        |        |        |        |        |
|--------|--------|--------|--------|--------|
| 45 999 | 59 236 | 60 212 | 79 181 | 63 171 |
| 47 140 | 43 135 | 46 124 | 92 117 | 64 109 |

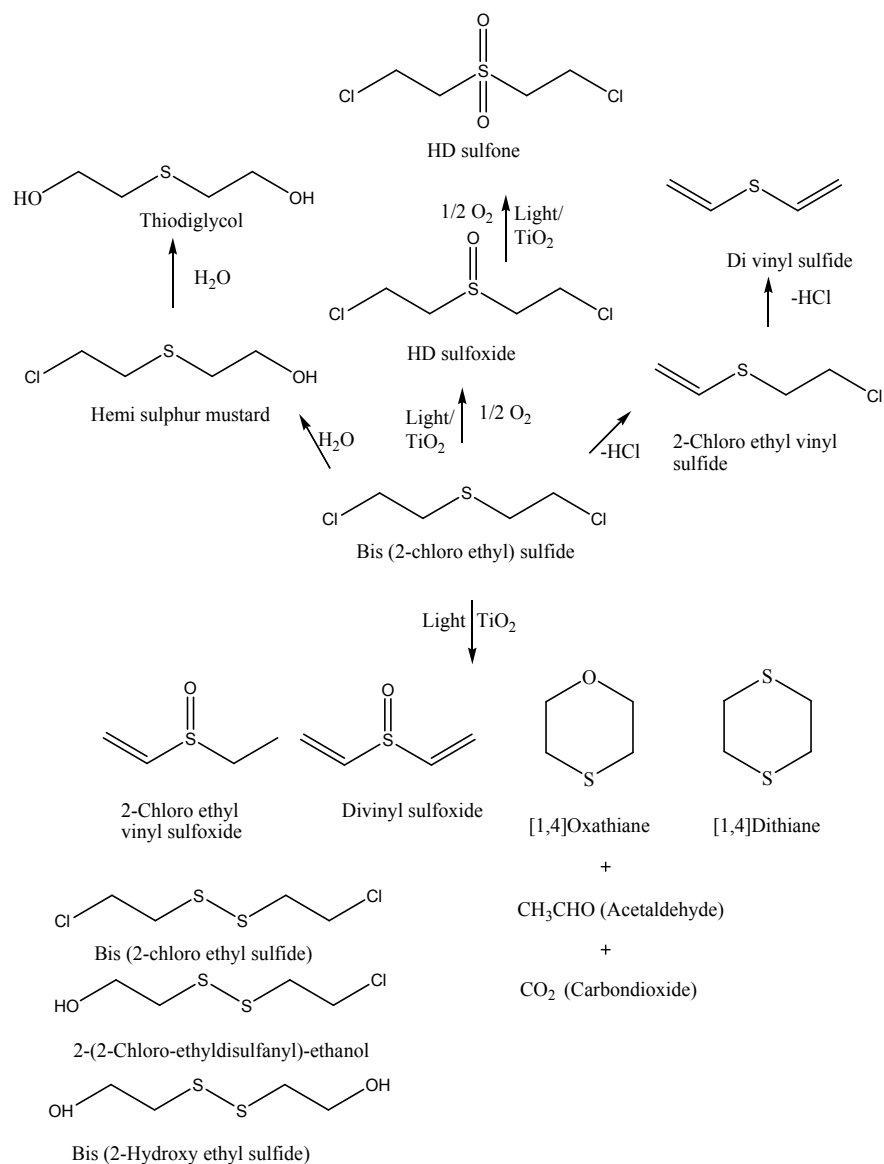

**Figure-S10:** Mechanism of photocatalytic degradation of sulphur mustard.

**Table S1: Toxicity of degraded materials**

| S. N. | Degraded Product             | LD <sub>50</sub> (mg/Kg)                                                                                                                    | LD <sub>L0</sub> (mg/Kg) |
|-------|------------------------------|---------------------------------------------------------------------------------------------------------------------------------------------|--------------------------|
| 1     | Sulfur Mustard (SM)          | mouse sc 125 iv 8.6 (b)<br>human oral 0.7 skin 20                                                                                           |                          |
| 2     | SM sulfoxide                 | NA                                                                                                                                          | 150 (b)                  |
| 3     | SM disulfide                 | NA                                                                                                                                          |                          |
| 4     | Chloroethylvinyl sulfide     | NA                                                                                                                                          | 100 (b)                  |
| 5     | Chloroethylvinyl sulfoxide   | NA                                                                                                                                          |                          |
| 6     | Thiodiglycol                 | Rat: oral, 6,610 mg/kg<br>Guinea pig: oral, 3,960 mg/kg<br>(a)<br>Rabbit: skin, 20 ml/kg                                                    |                          |
| 7     | Hemi sulfur mustard          | Rat: im, 500 pg/kg<br>Mouse: skin, 600 mg/kg<br>(a)<br>Mouse: 35 mg/kg                                                                      |                          |
| 8     | SM Sulfone                   | Rat: > 72 mg/kg<br>Mouse: 50 mg/kg<br>Rat: sc, 50 mg/kg<br>(a)<br>Mouse: sc, 35 mg/kg                                                       |                          |
| 9     | Divinyl sulfide              | Rat: oral, 170 mg/kg<br>Mouse: oral, 112 mg/kg<br>(a)<br>Rat: inhalation, 660 mg/m <sup>3</sup><br>Mouse: inhalation, 510 mg/m <sup>3</sup> |                          |
| 10    | Hydroxy ethylvinyl sulfoxide | Nontoxic<br>(b)                                                                                                                             |                          |

LD<sub>50</sub> = median lethal dose; LD<sub>L0</sub> = lowest lethal dose; ip = intraperitoneal; iv = intravenous; sc = subcutaneous; NA-Not available

#### References

- R1. N. B. Munro, S. S. Talmage, G. D. Griffin, L. C. Waters, A. P. Watson, J. F. King and V. Hauschild, *Environ. Heal. Persp.*, **1999**, 107, 933-974.  
R2. D. M. Mizrahi, M. Goldvaser, I. Columbus, *Environ. Sci. Technol.*, **2011**, 45, 3466–3472.
